# Supplementary material for: Deposition and facile control over the morphology of phase-pure SnS thin films via the spin-coating route
Source: Royal Society of Chemistry journal article supplement (doi:10.1039/d1ma01073e), 2022-01-01
Supplement: d1ma01073e1.pdf [file d1ma01073e1.pdf]

**Supporting Information**  
*to*  
**Deposition and Facile Control over Morphology of Phase-pure SnS  
Thin Films using Spin-coating Route**

Hui Liang, † Bingchen Li, † Gangri Cai\* and Song Xue\*

Tianjin Key Laboratory of Organic Solar Cells and Photochemical Conversion,  
Department of Applied Chemistry, Tianjin University of Technology, No. 391 Binshui  
Xidao, Xiqing District Tianjin 300384, P. R. China

\*E-mail: caigangri@sina.com, xuesong@ustc.edu.cn

†These authors contributed equally to this work

## **Detail Experiment**

### Preparation of SnS<sub>2</sub> Nanocrystal and dimeric thiostannate(IV) complex ([Sn<sub>2</sub>S<sub>6</sub>]<sup>4-</sup>)

Aqueous Solution: Amorphous SnS<sub>2</sub> nanocrystals were prepared by dissolving SnCl<sub>4</sub>·5H<sub>2</sub>O (Aldrich, 99.99+%) in 0.5 M HCl and bubbled with nitrogen and subsequently H<sub>2</sub>S (99.5%, should be handled with care and appropriate safety precautions). The nanocrystals were dried by three times decantation of ethanol and subsequently two times with diethyl ether, which was evaporated under a flow of nitrogen gas. The SnS<sub>2</sub> nanocrystals of 0.3426 g were dissolved in Milli-Q-water and two drops of (NH<sub>4</sub>)<sub>2</sub>S aqueous solution, resulting in a volume of 3.4 mL dimeric thiostannate(IV) complex [Sn<sub>2</sub>S<sub>6</sub>]<sup>4-</sup> aqueous Solution with a concentration of 0.18 M.

Preparation of precursor solution: For spin-coating, precursor solutions with different reducing agents of Hydrazine hydrate (Strem, 99.9+%), Hydrazine monohydrochloride (Strem, 99.9+%) and Hydrazine dihydrochloride (Strem, 99.9+%) were prepared by combining a small molecular reducing agent and dimeric thiostannate(IV) complex [Sn<sub>2</sub>S<sub>6</sub>]<sup>4-</sup> in (NH<sub>4</sub>)<sub>2</sub>S aqueous solution by molar ratio of [Sn<sub>2</sub>S<sub>6</sub>]<sup>4-</sup> : reducing agent as 1:2. Finally, the mixing solutions were stirring for 2h to make clear solutions.

Deposition of SnS films: The conducting and transparent substrates of F-doped tin oxide (FTO) were cut and cleaned by sequential 30 min sonication in ethanol, acetone, and deionized water, followed by drying under N<sub>2</sub> stream and oxygen plasma treatment for 10 min. The precursor solution was spin-coating deposited on FTO substrates with 3000 rpm for 30s following thermo-reducing annealing procedure 300 °C for 30 mins under N<sub>2</sub> stream.

Characterizations: The nanostructures were examined with advanced techniques, such as the energy dispersive analysis of X-rays (EDX, JEOL) attached with transmission

electron microscopy (TEM, FEI Talos) and Field emission scanning electron microscope (FESEM, ZEISSMERLIN Compact), X-ray diffractometry (XRD, Rigaku Ultima IV) with Cu KR1 radiation ( $\lambda = 0.1541$  nm) and UV-vis spectrophotometry (Hitachi 3900) in the wavelength range 350-1200 nm under normal light. A RENISHAW inVia confocal Raman spectrometer was used to measure the spectra of the samples at 532 nm, 50 mW laser, with the instrument spectrum ranging from  $10\text{ cm}^{-1}$  to  $9000\text{ cm}^{-1}$ . The materials for TEM measurement were scratched from substrates, and dispersed in ethanol. Electrochemical properties were examined using cyclic-voltammetry on the potentiostat/galvanostat/potentiometer (Epsilon-EC). In this study, platinum spiral wire and Ag/AgCl electrodes were used as the counter and the reference, respectively.

## Additional Figures

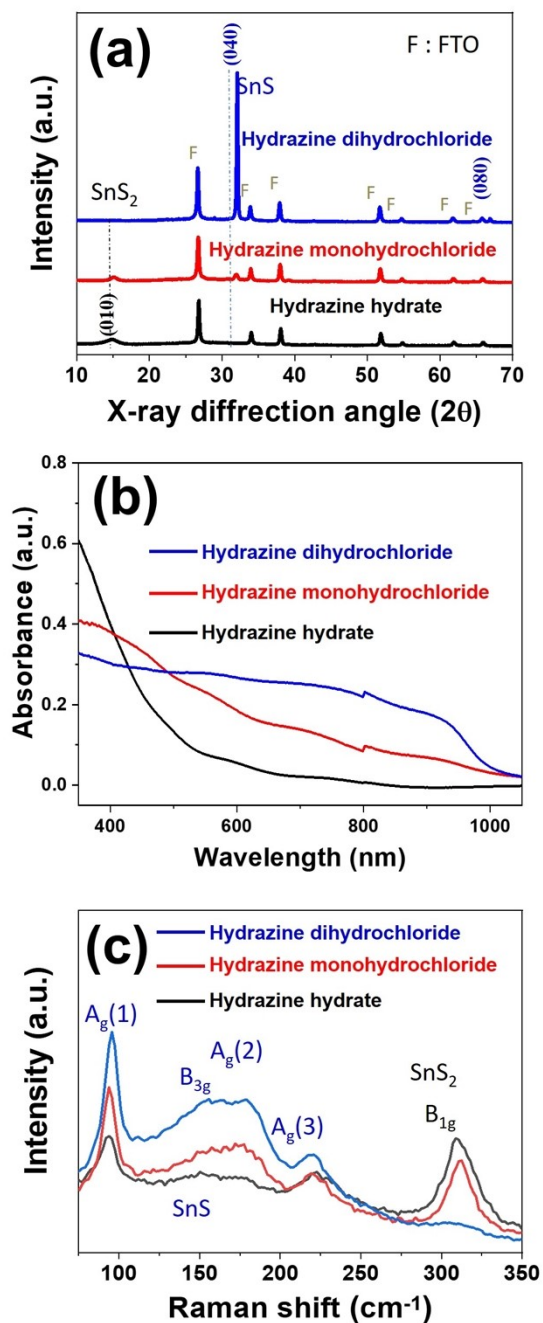

**Figure S1.** (a) XRD pattern, (b) UV-vis spectrum and (c) Raman shift spectrum of spin-coating deposited films after sequential thermo-reducing process with HH, HMC and HDC.

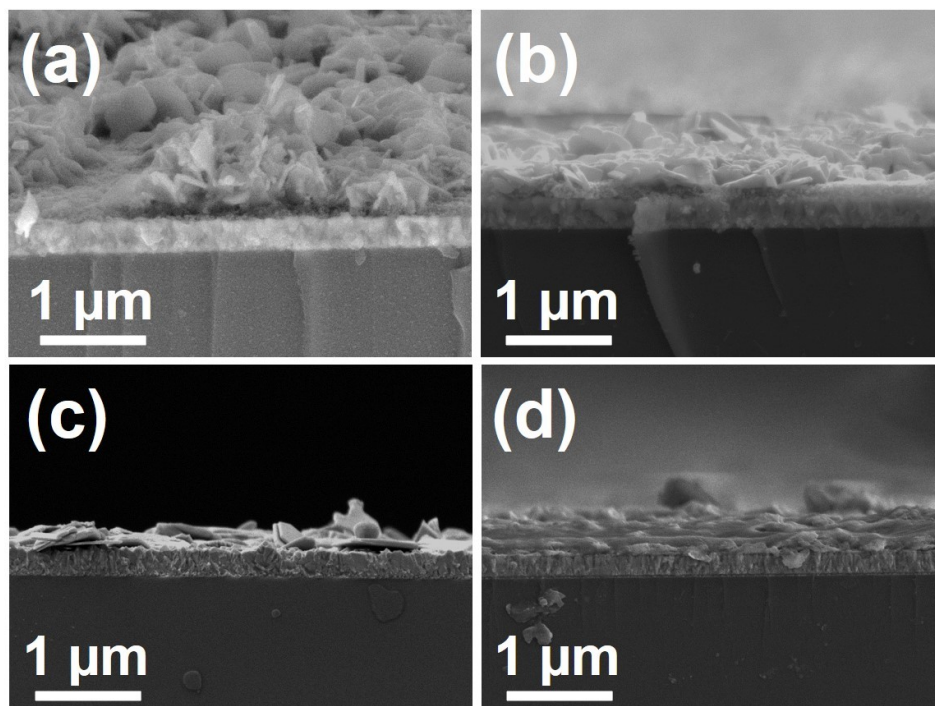

**Figure S2.** FESEM Cross-section views of SnS films on FTO with temperature ramping rate of 5 °C/min (a, e), 10 °C/min (b, f), 30 °C/min (c, g) and 60 °C/min (d, h).

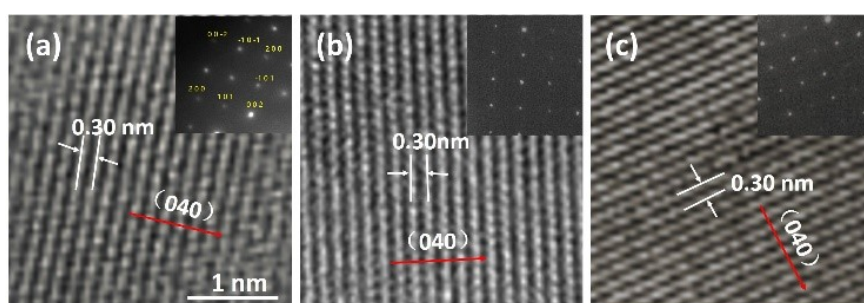

**Figure S3.** HRTEM images of (a) 5 °C/min, (b) 10 °C/min and (c) 60 °C/min (SAED patterns of SnS nanocrystals were shown as an inset).

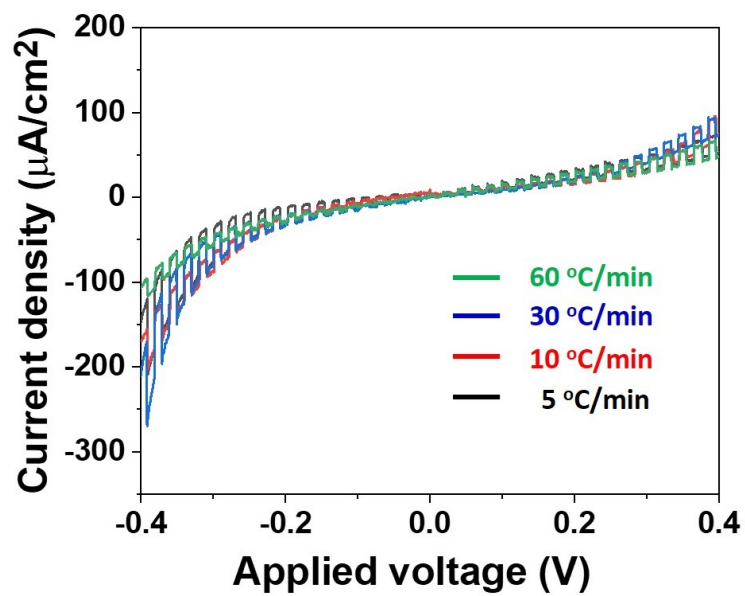

**Figure S4.** Cyclic voltammogram of p-type SnS films at  $2 \text{ mV s}^{-1}$  with chopped simulated 1 Sun illumination every 10 s in contact with  $0.1 \text{ M Eu}(\text{NO}_3)_3(\text{aq})$ .

### Additional Table

|               | Reducing with<br>HH | Reducing with<br>HMC | Reducing with<br>HDC |
|---------------|---------------------|----------------------|----------------------|
| Sn (Atomic %) | 38.5                | 43.2                 | 51.6                 |
| S (Atomic %)  | 61.5                | 56.8                 | 48.4                 |

**Table S1.** EDX analysis of spin-coating deposited films after sequential thermo-reducing process with HH, HMC and HDC.

|               | 5 °C/min | 10 °C/min | 30 °C/min | 60 °C/min |
|---------------|----------|-----------|-----------|-----------|
| Sn (Atomic %) | 49.4     | 49.2      | 50.3      | 50.1      |
| S (Atomic %)  | 50.6     | 50.8      | 49.7      | 49.9      |

**Table S2.** EDX analysis of SnS films with temperature ramping rate of 5 °C/min (a, e), 10 °C/min (b, f), 30 °C/min (c, g) and 60 °C/min (d, h).
